# Supplementary material for: Medical and public health professionals’ perceived facilitators and barriers of human papillomavirus (HPV) vaccination among African American adolescents in Shelby County, Tennessee
Source: Springer Nature journal article supplement (doi:10.1186/s12913-023-09415-6), 2023-05-10
Supplement: MOESM1 [file 12913_2023_9415_MOESM1_ESM.pdf]

## INDIVIDUAL INTERVIEW PROTOCOL

|         |                                                                                                                                                                                                                                                                                                                                                                                                                                                                                                                                                                                                                                                                                                                                                                                                                                                                                                               |
|---------|---------------------------------------------------------------------------------------------------------------------------------------------------------------------------------------------------------------------------------------------------------------------------------------------------------------------------------------------------------------------------------------------------------------------------------------------------------------------------------------------------------------------------------------------------------------------------------------------------------------------------------------------------------------------------------------------------------------------------------------------------------------------------------------------------------------------------------------------------------------------------------------------------------------|
| Topic 1 | <p><b>Communication with Patients for HPV and HPV Vaccinations</b></p> <p>a. PROBE: Have you ever talked about HPV or HPV vaccinations with your African American patients?</p> <p>b. PROBE: Have you ever recommended HPV vaccination to your patient?</p> <p>c. PROBE: If so, what were the responses from the patients to your recommendation?</p>                                                                                                                                                                                                                                                                                                                                                                                                                                                                                                                                                         |
| Topic 2 | <p><b>Barriers and Facilitators to HPV Vaccination</b></p> <p>Now, we'd like to listen to your thoughts of the barriers and facilitators to the HPV vaccination among African American adolescents.</p> <p>2. What do you think prevents adolescents from receiving HPV vaccines?</p> <p>a. PROBE: tell me what are barriers to participating in HPV vaccination among adolescents?</p> <p>b. PROBE: What concerns did your patients have about HPV vaccinations for their children?</p> <p>3. What do you think helps adolescents receive HPV vaccines?</p> <p>a. PROBE: What would be the most helpful for adolescents to come to participate in the HPV vaccination?</p> <p>b. PROBE: What information should be provided to parents in order to help their children receive HPV vaccinations?</p> <p>c. PROBE: What support do you think parents need to get their children receive HPV vaccinations?</p> |
| Topic 3 | <p><b>Strategies for HPV Vaccination Promotion</b></p> <p>Finally, we'd like to listen to your thoughts of strategies for promoting HPV vaccination among African American adolescents.</p> <p>4. Tell me about your thoughts of strategies for promoting HPV vaccination among adolescents.</p> <p>a. PROBE: What strategies should be developed to promote HPV vaccination among adolescents?</p> <p>b. PROBE: Would you recommend any technology that helps adolescents receive HPV vaccines?</p> <p>c. PROBE: What policies should be changed to promote HPV vaccination among adolescents?</p>                                                                                                                                                                                                                                                                                                           |
| Other   | <p>Does anyone have any final thoughts about the HPV vaccination for African American adolescents that you haven't gotten to share yet?</p>                                                                                                                                                                                                                                                                                                                                                                                                                                                                                                                                                                                                                                                                                                                                                                   |
